1 **Title: Clinical factors associated with racial differences in the prevalence of occult**  
2 **hypoxemia: a retrospective case-control study**

3  
4 **Authors:** Sofia K. Mettler, MD, MSc, MPH<sup>1,2,3,4</sup>, Nipith Charoenngam, MD<sup>2,4,6</sup>,  
5 Aunchalee Jaroenlapnopparat, MD<sup>2,4</sup>, Courtney Tern, BA<sup>3</sup>, Nutchapon Xanthavanij<sup>2,4</sup>,  
6 Sofia Economidou<sup>2,4</sup>, Matthew J. Strand, PhD<sup>8</sup>, Brian D. Hobbs, MD, MSc<sup>3,4,5</sup>, Matthew  
7 Moll, MD, MPH<sup>3,4,5,7</sup>, Michael H. Cho, MD, MPH<sup>3,4,5</sup>

8  
9 **Affiliations:**

10 1: Faculty of Medicine, University of Zurich, Zurich, Switzerland

11 2: Mount Auburn Hospital, Cambridge, MA, United States

12 3: Channing Division of Network Medicine, Brigham and Women's Hospital, Boston, MA,  
13 United States

14 4: Harvard Medical School, Boston, MA, United States

15 5: Division of Pulmonary and Critical Care Medicine, Brigham and Women's Hospital,  
16 Boston, MA, United States

17 6: Faculty of Medicine, Mahidol University, Bangkok, Thailand

18 7: Pulmonary, Allergy, Sleep and Critical Care Medicine Section, Veterans Affairs  
19 Boston Healthcare System, West Roxbury, MA, United States

20 8: Division of Biostatistics and Bioinformatics, National Jewish Health, Denver, Colorado,  
21 United States

22  
23 **Corresponding author:**

24 Sofia K. Mettler

25 Phone: +1 617 492 3500

26 Email: [sofiakyonhi.mettler@uzh.ch](mailto:sofiakyonhi.mettler@uzh.ch)

27 Mailing address: 330 Mount Auburn St, Cambridge, MA 02138, USA

28

29 **Clinical factors associated with racial differences in the prevalence of occult**  
30 **hypoxemia: a retrospective case-control study**

31

32 **Background**

33 Recent studies showed that Black patients more often have falsely normal oxygen  
34 saturation on pulse oximetry compared to White patients. However, whether the racial  
35 differences in occult hypoxemia are mediated by other clinical differences is unknown.

36

37 **Methods**

38 We conducted a retrospective case-control study utilizing two large ICU databases  
39 (eICU and MIMIC-IV). We defined occult hypoxemia as oxygen saturation on pulse  
40 oximetry within 92-98% despite oxygen saturation on arterial blood gas below 90%. We  
41 assessed associations of commonly measured clinical factors with occult hypoxemia  
42 using multivariable logistic regression and conducted mediation analysis of the racial  
43 effect.

44

45 **Results**

46 Among 24,641 patients, there were 1,855 occult hypoxemia cases and 23,786 controls.  
47 In both datasets, Black patients were more likely to have occult hypoxemia (unadjusted  
48 odds ratio 1.66 [95%-CI: 1.41-1.95] in eICU and 2.00 [95%-CI: 1.22-3.14] in MIMIC-IV).  
49 In multivariable models, higher respiratory rate, PaCO<sub>2</sub> and creatinine as well as lower  
50 hemoglobin were associated with increased odds of occult hypoxemia. Differences in  
51 the commonly measured clinical markers accounted for 9.2% and 44.4% of the racial  
52 effect on occult hypoxemia in eICU and MIMIC-IV, respectively.

53

54 **Conclusion**

55 Clinical differences, in addition to skin tone, might mediate some of the racial  
56 differences in occult hypoxemia.

57

58 **Keywords:** *Occult hypoxemia, pulse oximetry, racial, bias, difference, disparity, critical*  
59 *care, intensive care, ICU, blood gas, oxygen saturation, SaO<sub>2</sub>, SpO<sub>2</sub>.*

## 60 **Introduction**

61 Pulse oximetry is an essential tool to identify hypoxemia. However, recent studies  
62 reported that Black patients are more likely to have falsely normal pulse oximetry  
63 (SpO<sub>2</sub>) readings compared to White patients while their arterial oxygen saturation  
64 measured by blood gas (SaO<sub>2</sub>) is abnormally low – a phenomenon referred to as  
65 “occult hypoxemia” (1-6). Occult hypoxemia may delay appropriate treatment, resulting  
66 in systemic racial disparities in medical care and outcomes (2-6).

67 While differences in skin pigmentation are suspected to contribute to the racial  
68 differences in pulse oximetry accuracy (7, 8), other possible mechanisms have been  
69 proposed. These include severity of illness, underlying comorbidities, hemoglobinopathy  
70 as well as serum biochemistry that may affect light absorbance (9-12). However, the  
71 relative contribution of these factors to the occurrence of occult hypoxemia and its racial  
72 difference remains unclear. Using two large intensive care unit (ICU) databases, we  
73 aimed to identify factors that are associated with occult hypoxemia and quantify how  
74 much of the racial difference in occult hypoxemia is attributable to differences in these  
75 factors using mediation analysis.

## 77 **Methods**

78 We conducted a retrospective case-control study utilizing two publicly available  
79 databases: the electronic Intensive Care Unit collaborative research database (eICU)  
80 and Medical Information Mart for Intensive Care (MIMIC-IV). The eICU database  
81 contains clinical data of ICU admissions between 2014 and 2015 at more than 200  
82 hospitals across the United States (13). The MIMIC-IV database contains clinical data of  
83 ICU admissions at an academic tertiary care center in Boston, Massachusetts between  
84 2008 and 2019 (14). Both databases are deidentified and approved by the institutional  
85 review boards of Massachusetts Institute of Technology and participating hospitals. For  
86 all our analyses, we used the eICU as our initial dataset, and MIMIC-IV as validation.

87 **Inclusion criteria** We included adult patients (18 to 89 years-old) with at least one  
88 SaO<sub>2</sub> measurement. The inclusion flow chart is available in Figure 1. We limited our  
89 analyses to Black and White patients when examining the racial effect.

90 **SaO<sub>2</sub>-SpO<sub>2</sub> pairs** As done in previous studies (2, 6), we included only the first SaO<sub>2</sub>-  
91 SpO<sub>2</sub> pair for a given patient to limit potential confounding from repeat measurements.  
92 We paired the first SaO<sub>2</sub> measurement of each patient with the closest pulse oximetry  
93 (SpO<sub>2</sub>) value, allowing a maximum time difference of 10 minutes between the two. We  
94 repeated the analysis allowing a maximum time difference of 5 minutes.

95 **Definition of occult hypoxemia cases and controls** We defined occult hypoxemia  
96 cases as SaO<sub>2</sub> 70-89% measured by arterial blood gas while SpO<sub>2</sub> is between 92%  
97 and 98%, because hypoxemia with SaO<sub>2</sub> <90% is reported to be associated with worse  
98 outcomes (15, 16), and controls as SaO<sub>2</sub> ≥ 90% with SpO<sub>2</sub> between 92% and 98%.

99 **Covariate selection** Our criteria for covariate selection were the following: 1) routinely  
100 available clinical data, excluding factors that can be affected by external circumstances,  
101 such as treatment or diagnosis code, 2) available in both eICU and MIMIC-IV, and 3)  
102 not missing in more than 30% of observations. The selected covariates were  
103 demographics (age, gender, race, BMI), vital signs (heart rate, respiratory rate, systolic  
104 blood pressure and temperature) as well as laboratory tests (PaCO<sub>2</sub>, arterial pH,  
105 hemoglobin, MCV, white blood cell count, platelet count, Na, K, creatinine, and glucose  
106 levels). We excluded highly correlated variables in the multivariable models. For  
107 example, we included hemoglobin into the model and excluded hematocrit, MCHC and  
108 MCH.

109

110 **Statistical analysis** We compared the means of continuous variables using two sample  
111 t-tests, count data using chi-square tests and proportions using two-sample proportion  
112 z-tests. We assessed associations of occult hypoxemia with covariates using  
113 multivariable logistic regression models (see Supplement A for the directed acyclic  
114 graph considered in our study). We performed mediation analysis and calculated the  
115 proportion of the racial effect mediated by covariates (17, 18). We performed all  
116 analyses in eICU first and attempted to reproduce the results in MIMIC-IV. Statistical  
117 significance was defined as p-value smaller than 0.05. All statistical analyses are  
118 performed using the statistical software R (version 4.2.1). Additional methods including  
119 data extraction and outlier removal are explained in detail in Supplement B.

120

## 121 **Results**

122 A total of 57,879 SaO<sub>2</sub>-SpO<sub>2</sub> pairs from 57,879 patients were available (47,519 from  
123 eICU and 10,360 from MIMIC-IV). Among these, we identified occult hypoxemia cases  
124 and controls in 24,641 patients.

### 125 **Patient characteristics**

126 Among 20,297 patients in eICU whose SpO<sub>2</sub> ranged between 92% and 98%, occult  
127 hypoxemia (SaO<sub>2</sub><90%) was found in 1,656 patients (8.16%). The overall prevalence of  
128 occult hypoxemia was lower in MIMIC-IV (199 patients among 4,344 patients, 4.58%).  
129 Patient characteristics are compared between occult hypoxemia cases and controls in  
130 Table 1. Many of the statistically significant differences found in eICU were replicable in  
131 MIMIC-IV.

132 Patient characteristics are compared between White and Black patients in  
133 Supplementary Table 1. We confirmed that occult hypoxemia was more prevalent  
134 among Black patients (12.3% vs. 7.8% in eICU and 8.0% vs. 4.2% in MIMIC-IV). Of the  
135 clinical differences observed in occult hypoxemia cases, higher heart rate, higher  
136 respiratory rate, lower hemoglobin, lower MCV, higher lactate, and higher creatinine,  
137 were observed in Black patients compared to White patients. While there was no  
138 statistically significant difference in mortality by race in eICU, the in-hospital mortality

139 was significantly higher among Black patients compared to White patients in MIMIC-IV  
140 (20% vs. 15%).

141

## 142 **Effect of race and covariates on occult hypoxemia**

143 The unadjusted odds of having occult hypoxemia were significantly higher in Black vs.  
144 White individuals in both datasets (Odds ratio 1.66, [95% CI: 1.41, 1.95] in eICU and  
145 2.00, [95% CI: 1.22, 3.14] in MIMIC-IV).

146 In the multivariable model (Figure 2, Supplementary Table 2), we found statistically  
147 significant associations of the odds of occult hypoxemia with younger age, higher  
148 PaCO<sub>2</sub>, lower arterial pH, higher respiratory rate, lower systolic blood pressure, lower  
149 hemoglobin level, and higher creatinine level in eICU. Similar patterns were observed in  
150 MIMIC-IV, although the differences in pH, systolic blood pressure did not reach  
151 statistical significance. After covariate adjustment, race was not statistically significantly  
152 associated with occult hypoxemia in both datasets. The proportion of the racial effect  
153 mediated by clinical factors included in this analysis was estimated to be 9.2% in eICU  
154 and 44.4% in MIMIC-IV.

155

156 All analyses were repeated using SaO<sub>2</sub> and SpO<sub>2</sub> pairs that are maximum 5 minutes  
157 apart and the results were consistent (Supplement C).

158

## 159 **Discussion**

160 Despite the importance of commercially available pulse oximeters to rapidly identify  
161 hypoxemia, the reduced accuracy in Black patients is a major concern. Our study  
162 compared a comprehensive list of commonly available clinical markers between occult  
163 hypoxemia and control and confirmed some of the differences reported in previous  
164 studies (2, 4). We also compared differences in these clinical markers between Black  
165 and White individuals. We examined each effect in multivariable models and assessed

166 how much of the racial effect on the prevalence of occult hypoxemia is mediated by the  
167 racial differences in these clinical markers.

168

169 In our study, Black patients were more likely to have clinical indicators associated with  
170 shock state or poor peripheral perfusion such as higher heart rate, respiratory rate,  
171 creatinine and lactate levels. Erickson et al. reported that Black patients tend to have  
172 more severe illness measured by Acute Physiology Score at the time of ICU admissions  
173 (19). Tolchin et al. found Black patients were more likely to have a higher SOFA score  
174 than White patients at the time of hospitalization (20). Our results suggest that Black  
175 patients may be sicker when they are treated in intensive care units, and racial  
176 disparities in the delivery of critical care medicine may be contributing to the racial  
177 difference in the prevalence of occult hypoxemia. Notably, a recent study by Gudelunas  
178 et al. suggested that low perfusion state is a significant contributor to the pulse oximetry  
179 errors when combined with darker skin pigmentation (21).

180

181 Our study has several limitations. While our study suggests certain clinical factors may  
182 account for racial differences in the prevalence of occult hypoxemia, our mediation  
183 analysis does not prove causal direction. We could not assess some important factors  
184 that may affect pulse oximetry accuracy due to data limitations, such skin tone, smoking  
185 status, COHb, MetHb, or use of nail colors. We did not include medication use such as  
186 vasopressors, as this could depend on provider practice or goals of care. We chose to  
187 not include comorbidities due to uncertainty about the accuracy of diagnosis codes, and  
188 model complexity.

189

## 190 **Conclusion**

191 Clinical differences, in addition to skin tone, may play a role in the increased prevalence  
192 of occult hypoxemia in Black patients. Further studies are needed to assess whether  
193 accounting for these clinical discrepancies can reduce the racial differences in the  
194 prevalence of occult hypoxemia.





196 **Declaration**

197

198 **Ethics approval and consent to participate:**

199 The study is exempt from institutional review board approval due to the retrospective  
200 design, lack of direct patient intervention, and the security schema, for which the re-  
201 identification risk was certified as meeting safe harbor standards by an independent  
202 privacy expert (Privacert, Cambridge, MA) (Health Insurance Portability and  
203 Accountability Act Certification no. 1031219-2).

204 **Institutional Review Board (IRB) statement**

205 Because our study did not fall under the board's guidelines as human subjects research,  
206 no IRB review was necessary (and thus no number was assigned).

207

208 **Consent for publication:**

209 Not applicable.

210

211 **Availability of data and materials:**

212 The datasets analyzed during the current study are available under the links  
213 <https://eicu-crd.mit.edu/> and <https://mimic.mit.edu/>. All data generated during this study  
214 are included in this published article and its supplementary information files.

215

216 **Competing interests:**

217 BDH, MHC, and MM have received grant support from Bayer. BDH has received an  
218 honorarium from AstraZeneca for an educational lecture, unrelated to this work. MM has  
219 also received consulting fees from Sitka, TheaHealth, 2ndMD, TriNetX, and Verona  
220 Pharma, unrelated to this work. All other authors declare no conflict of interest.

221

222 **Funding statement:**

223 BDH was supported by R01 HL162813, R01 HL155749, R01 HL160008, U01  
224 HL089856, and a Research Grant from the Alpha-1 Foundation. MHC was supported by  
225 was supported by R01HL089897. The content is solely the responsibility of the authors  
226 and does not necessarily represent the official views of the NIH. The funding body has

227 no role in the design of the study and collection, analysis, and interpretation of data and  
228 in writing the manuscript.

229

230 **Authors' contributions:**

231 SM and MC devised the research question and study design. SM curated, analyzed  
232 data, conducted literature review, and wrote the manuscript. NC and AJ conducted  
233 literature review and wrote the manuscript. CT reviewed the programming code for data  
234 analysis. NX and SE provided support for literature review. MS and MM provided  
235 statistical support. MM, BH and MC provided support for writing the manuscript and  
236 supervised the entire work. All authors read and approved the final manuscript.

237

## 238 Reference

- 239
- 240 1. Sjoding MW, Dickson RP, Iwashyna TJ, et al: Racial Bias in Pulse Oximetry  
241 Measurement. *N Engl J Med* 2020; 383(25):2477-2478
- 242 2. Wong AKI, Charpignon M, Kim H, et al: Analysis of Discrepancies between Pulse  
243 Oximetry and Arterial Oxygen Saturation Measurements by Race and Ethnicity and Association  
244 with Organ Dysfunction and Mortality. *JAMA Network Open* 2021; 4(11)
- 245 3. Burnett GW, Stannard B, Wax DB, et al: Self-reported Race/Ethnicity and Intraoperative  
246 Occult Hypoxemia: A retrospective cohort study. *Anesthesiology* 2022; 136(5):688-696
- 247 4. Fawzy A, Wu TD, Wang K, et al: Racial and Ethnic Discrepancy in Pulse Oximetry and  
248 Delayed Identification of Treatment Eligibility among Patients with COVID-19. *JAMA Internal  
249 Medicine* 2022; 182(7):730-738
- 250 5. Henry NR, Hanson AC, Schulte PJ, et al: Disparities in Hypoxemia Detection by Pulse  
251 Oximetry Across Self-Identified Racial Groups and Associations With Clinical Outcomes. *Critical  
252 Care Medicine* 2022; 50(2):204-211
- 253 6. Valbuena VSM, Barbaro RP, Claar D, et al: Racial Bias in Pulse Oximetry Measurement  
254 Among Patients About to Undergo Extracorporeal Membrane Oxygenation in 2019-2020: A  
255 Retrospective Cohort Study. *Chest* 2022; 161(4):971-978
- 256 7. Bickler PE, Feiner JR, Severinghaus JW: Effects of skin pigmentation on pulse oximeter  
257 accuracy at low saturation. *Anesthesiology* 2005; 102(4):715-719
- 258 8. Jubran A, Tobin MJ: Effect of isocapnic hypoxia on variational activity of breathing.  
259 *American Journal of Respiratory and Critical Care Medicine* 2000; 162(4 1):1202-1209
- 260 9. Patterson S, Sandercock N, Verhovsek M: Understanding pulse oximetry in hematology  
261 patients: Hemoglobinopathies, racial differences, and beyond. *Am J Hematol* 2022;  
262 97(12):1659-1663
- 263 10. Tashiro C, Koo YH, Fukumitsu K, et al: Effects of carboxyhemoglobin on pulse oximetry  
264 in humans. *J Anesth* 1988; 2(1):36-40
- 265 11. Pu LJ, Shen Y, Lu L, et al: Increased blood glycohemoglobin A1c levels lead to  
266 overestimation of arterial oxygen saturation by pulse oximetry in patients with type 2 diabetes.  
267 *Cardiovasc Diabetol* 2012; 11:110
- 268 12. Mardirossian G, Schneider RE: Limitations of pulse oximetry. *Anesth Prog* 1992;  
269 39(6):194-196
- 270 13. Pollard TJ, Johnson AEW, Raffa JD, et al: The eICU Collaborative Research Database,  
271 a freely available multi-center database for critical care research. *Sci Data* 2018; 5:180178
- 272 14. Johnson A, Bulgarelli, L., Pollard, T., Horng, S., Celi, L. A., & Mark, R: MIMIC-IV (version  
273 2.2). *PhysioNet* 2023
- 274 15. Xie J, Covassin N, Fan Z, et al: Association Between Hypoxemia and Mortality in  
275 Patients With COVID-19. *Mayo Clin Proc* 2020; 95(6):1138-1147
- 276 16. Majumdar SR, Eurich DT, Gamble JM, et al: Oxygen saturations less than 92% are  
277 associated with major adverse events in outpatients with pneumonia: a population-based cohort  
278 study. *Clin Infect Dis* 2011; 52(3):325-331
- 279 17. Steen J, Loeys T, Moerkerke B, et al: Flexible Mediation Analysis With Multiple  
280 Mediators. *Am J Epidemiol* 2017; 186(2):184-193
- 281 18. Steen J, Loeys, T., Moerkerke, B., & Vansteelandt, S. : medflex: An R Package for  
282 Flexible Mediation Analysis using Natural Effect Models. . *Journal of Statistical Software* 2017;  
283 76(11), 1–46
- 284 19. Erickson SE, Vasilevskis EE, Kuzniewicz MW, et al: The effect of race and ethnicity on  
285 outcomes among patients in the intensive care unit: a comprehensive study involving  
286 socioeconomic status and resuscitation preferences. *Crit Care Med* 2011; 39(3):429-435

- 287 20. Tolchin B, Oladele C, Galusha D, et al: Racial disparities in the SOFA score among  
288 patients hospitalized with COVID-19. *PLoS One* 2021; 16(9):e0257608  
289 21. Gudelunas MK, Lipnick M, Hendrickson C, et al: Low Perfusion and Missed Diagnosis of  
290 Hypoxemia by Pulse Oximetry in Darkly Pigmented Skin: A Prospective Study. *Anesth Analg*  
291 2024; 138(3):552-561  
292  
293

294 **Table1. Patient characteristics by occult hypoxemia vs. control.** Univariable comparison  
 295 between cases and controls. \*Missing values in more than 30% of observations.

|                                       | eICU                         |                      |             | MIMIC-IV                    |                     |             |
|---------------------------------------|------------------------------|----------------------|-------------|-----------------------------|---------------------|-------------|
|                                       | Occult hypoxemia<br>(n=1656) | Control<br>(n=18641) | p-<br>value | Occult hypoxemia<br>(n=199) | Control<br>(n=4145) | p-<br>value |
| <b>Demographic</b>                    |                              |                      |             |                             |                     |             |
| <b>Race/Ethnicity, %</b>              |                              |                      |             |                             |                     |             |
| White                                 | 77.9%                        | 81.7%                | <0.001      | 62.3%                       | 68.6%               | 0.06        |
| Black                                 | 11.5%                        | 7.2%                 |             | 11.1%                       | 6.1%                |             |
| Hispanic/Latino                       | 4%                           | 3.7%                 |             | 5%                          | 3.3%                |             |
| Asian                                 | 1.4%                         | 1.1%                 |             | 1.5%                        | 1.9%                |             |
| American Indian                       | 0.7%                         | 0.7%                 |             | 0%                          | 0.2%                |             |
| Other/Unknown                         | 4.5%                         | 5.6%                 |             | 20.1%                       | 20%                 |             |
| Male, %                               | 55.7%                        | 56%                  | 0.84        | 57.8%                       | 63%                 | 0.16        |
| Female, %                             | 44.3%                        | 44%                  |             | 42.2%                       | 37%                 |             |
| Age, y                                | 63.43 (14.5)                 | 64.05 (15)           | 0.1         | 63.41 (14.7)                | 65.66 (13.8)        | 0.035       |
| BMI, kg/m2                            | 31.49 (13.9)                 | 31.11 (11.5)         | 0.3         | 29.89 (9.1)                 | 30.22 (7.8)         | 0.66        |
| <b>Arterial blood gas</b>             |                              |                      |             |                             |                     |             |
| SaO2, %                               | 85.38 (4.6)                  | 95.46 (2.5)          | <0.001      | 85.5 (4.5)                  | 95.62 (2.1)         | <0.001      |
| paCO2, mmHg                           | 50.87 (18.4)                 | 44.36 (15.1)         | <0.001      | 49.1 (16.6)                 | 42.08 (10.5)        | <0.001      |
| pH                                    | 7.31 (0.1)                   | 7.35 (0.1)           | <0.001      | 7.34 (0.1)                  | 7.36 (0.1)          | 0.004       |
| Carboxyhemoglobin*, %                 | 1.37 (1)                     | 1.13 (0.9)           | <0.001      | 1.57 (0.8)                  | 1.34 (0.7)          | 0.33        |
| Methemoglobin*, %                     | 0.63 (0.4)                   | 0.54 (0.4)           | <0.001      | 1.34 (2.9)                  | 1.73 (3.4)          | 0.73        |
| <b>Vital signs</b>                    |                              |                      |             |                             |                     |             |
| SpO2, %                               | 94.46 (1.9)                  | 95.99 (1.8)          | <0.001      | 94.33 (1.9)                 | 95.97 (1.8)         | <0.001      |
| Heart rate, bpm                       | 93.87 (21)                   | 91.58 (20.3)         | <0.001      | 92.65 (20.1)                | 87.63 (18)          | <0.001      |
| Respiratory rate, breaths/min         | 22.17 (7.4)                  | 20.99 (7.4)          | <0.001      | 22.05 (6.5)                 | 20.06 (5.9)         | <0.001      |
| Temperature, C°                       | 36.74 (1)                    | 36.83 (0.8)          | <0.001      | 36.78 (0.9)                 | 36.91 (0.8)         | 0.047       |
| Systolic blood pressure, mmHg         | 117.03 (26.6)                | 119.69 (25.7)        | <0.001      | 116.45 (25.3)               | 113.48 (20.5)       | 0.11        |
| <b>Blood count</b>                    |                              |                      |             |                             |                     |             |
| Hemoglobin, g/dL                      | 11.11 (2.4)                  | 11.35 (2.3)          | <0.001      | 10.03 (2.1)                 | 10.48 (1.9)         | 0.003       |
| Hematocrit, %                         | 34.02 (7.2)                  | 34.55 (6.9)          | 0.004       | 30.83 (6.5)                 | 31.51 (5.4)         | 0.15        |
| White blood cell count, 1000/ $\mu$ L | 13.45 (8.5)                  | 13.48 (7.7)          | 0.9         | 14.54 (10.2)                | 14.1 (7.3)          | 0.55        |
| Platelet count, 1000/ $\mu$ L         | 199.74 (100.9)               | 206.7 (100.9)        | 0.008       | 187.88 (115.9)              | 184.88 (100.1)      | 0.72        |
| MCV, fL                               | 91.45 (7.6)                  | 90.96 (6.9)          | 0.014       | 92.66 (7.8)                 | 90.89 (6.5)         | 0.002       |
| <b>Chemistry</b>                      |                              |                      |             |                             |                     |             |
| Na, mEq/L                             | 138.43 (5.6)                 | 138.54 (5.4)         | 0.46        | 138.52 (5.2)                | 138.62 (4.6)        | 0.79        |
| K, mEq/L                              | 4.25 (0.8)                   | 4.16 (0.7)           | <0.001      | 4.21 (0.6)                  | 4.29 (0.6)          | 0.11        |
| Bicarbonate, mEq/L                    | 25.09 (8.1)                  | 24.24 (6.7)          | <0.001      | 24.75 (6.9)                 | 23.26 (4.9)         | 0.003       |
| Creatinine, mg/dL                     | 1.81 (1.6)                   | 1.54 (1.5)           | <0.001      | 1.76 (1.6)                  | 1.44 (1.2)          | 0.004       |
| Glucose, mg/dL                        | 157.14 (86.9)                | 155.36 (74.7)        | 0.42        | 159.41 (85.5)               | 138.73 (55.7)       | <0.001      |
| Lactate*, mmol/L                      | 3.04 (3.4)                   | 2.54 (2.6)           | <0.001      | 2.37 (2.4)                  | 2.28 (2.1)          | 0.61        |
| Total bilirubin*, mg/dL               | 1.36 (3.2)                   | 1.21 (2.4)           | 0.11        | 2.29 (5.5)                  | 2.07 (4.5)          | 0.61        |
| <b>Other</b>                          |                              |                      |             |                             |                     |             |
| In-hospital mortality                 | 0.22 (0.4)                   | 0.15 (0.4)           | <0.001      | 0.35 (0.5)                  | 0.18 (0.4)          | <0.001      |

296

297

298 **Figure 1. Inclusion flow chart** \*One SaO<sub>2</sub>-SpO<sub>2</sub> pair (the earliest) per patient was included.  
 299 \*\*The condition of defining occult hypoxemia cases or controls was that SpO<sub>2</sub> is within 92-98%  
 300 and SaO<sub>2</sub> is 70% or above.

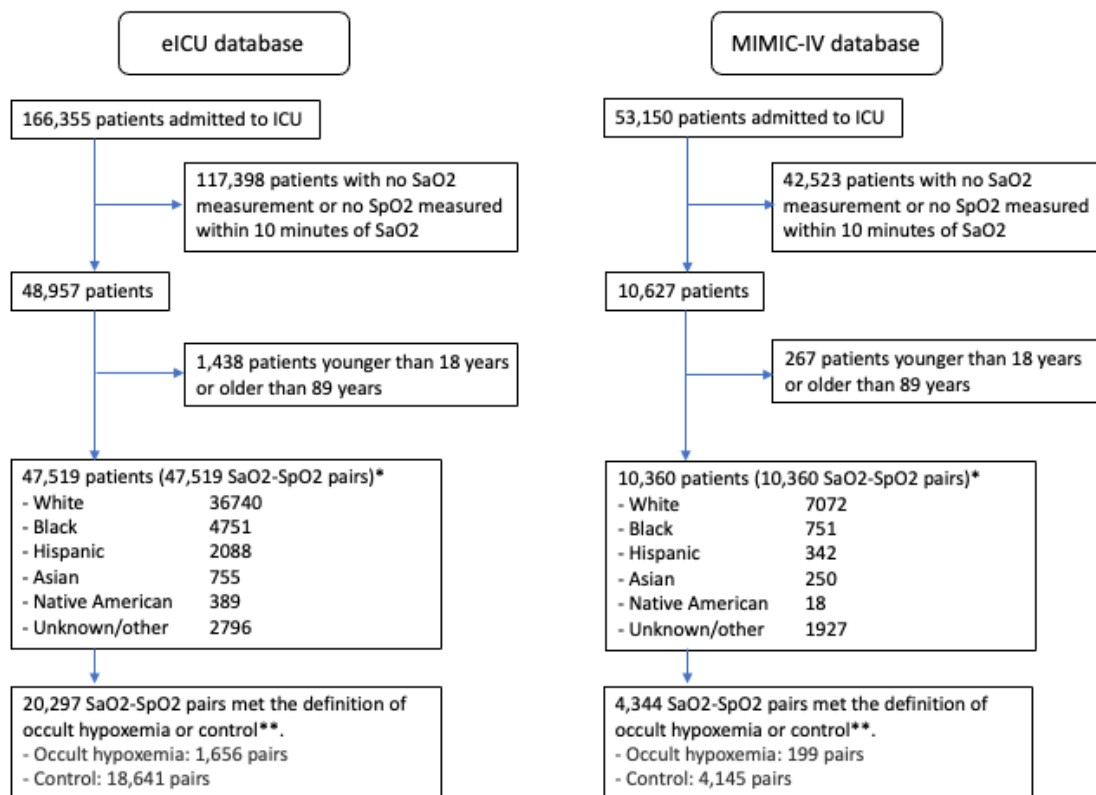

301

302 **Figure 2. Odds ratios of occult hypoxemia for each covariate and the 95% confidence**  
303 **intervals in multivariable logistic regression models.** Age, BMI, paCO<sub>2</sub>, heart rate,  
304 respiratory rate and sodium level are scaled by a factor of 5. Systolic blood pressure, white  
305 blood cell count and MCV are scaled by a factor of 10. Platelet count and glucose are scaled by  
306 a factor of 100. Arterial blood pH is scaled by a factor of 1/10.  
307

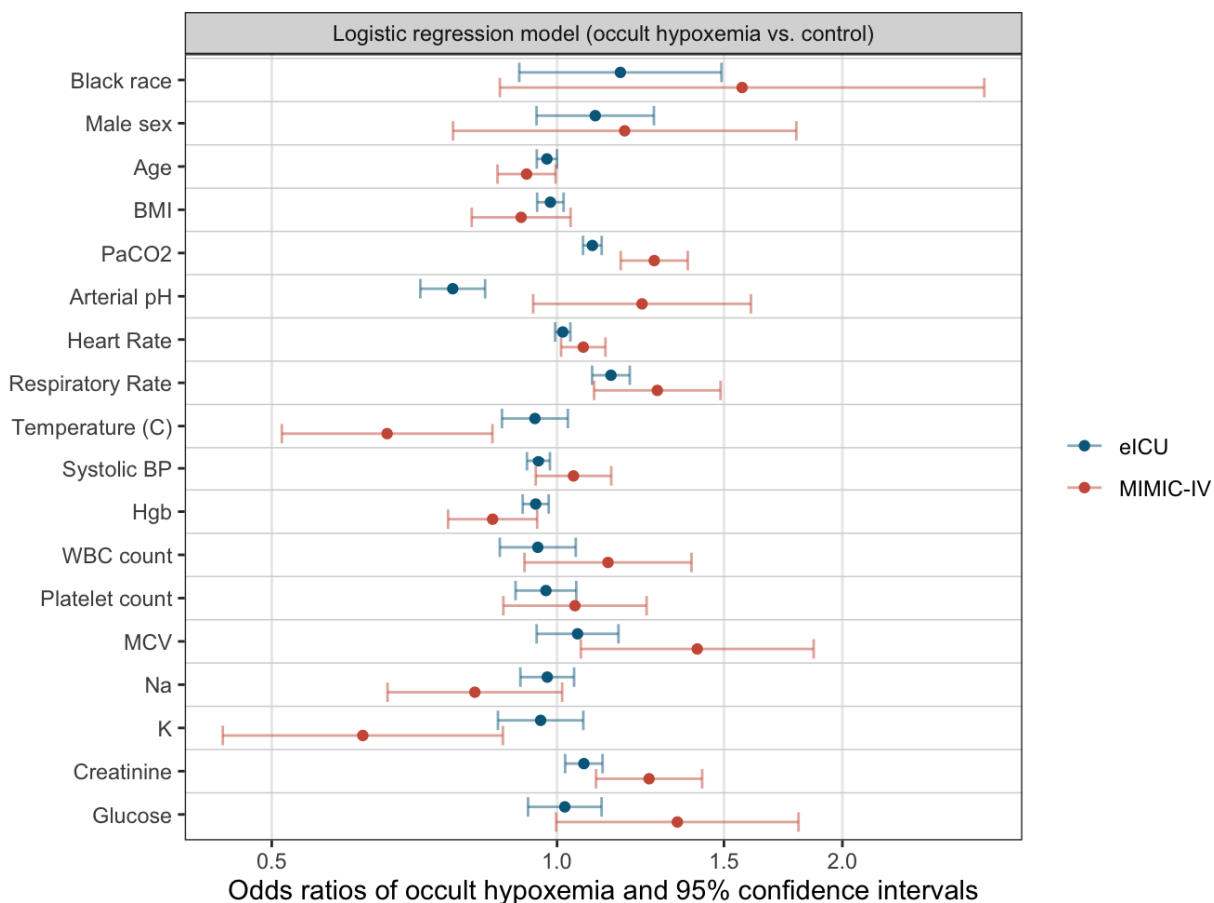

308  
309  
310





312 **Supplementary Table 1. Patient characteristics by race.** Univariable comparison between  
 313 White and Black patients. †Occult hypoxemia could not be defined when SpO2 was not within  
 314 92 and 98%, or SaO2 was below 70%. \*Missing values in more than 30% of observations.

|                                    | eICU               |                   | p-value | MIMIC-IV          |                  | p-value |
|------------------------------------|--------------------|-------------------|---------|-------------------|------------------|---------|
|                                    | White<br>(n=36740) | Black<br>(n=4751) |         | White<br>(n=7072) | Black<br>(n=751) |         |
| <b>Case vs. control, count (%)</b> |                    |                   |         |                   |                  |         |
| Occult hypoxemia                   | 15223 (92.2%)      | 1350 (87.7%)      | <0.001  | 2843 (95.8%)      | 252 (92%)        | 0.005   |
| Control                            | 1290 (7.8%)        | 190 (12.3%)       |         | 124 (4.2%)        | 22 (8%)          |         |
| Not definable†                     | 20227              | 3211              |         | 4105              | 477              |         |
| <b>Demographic</b>                 |                    |                   |         |                   |                  |         |
| Male, %                            | 55.8%              | 52.2%             | <0.001  | 65.3%             | 52.2%            | <0.001  |
| Female, %                          | 44.2%              | 47.8%             |         | 34.7%             | 47.8%            |         |
| Age, y                             | 64.32 (15.2)       | 58.86 (15.8)      | <0.001  | 67.11 (12.9)      | 63 (14.3)        | <0.001  |
| BMI, kg/m2                         | 30.09 (11.4)       | 30.94 (12.7)      | <0.001  | 29.38 (7.2)       | 29.9 (8.3)       | 0.13    |
| <b>Arterial blood gas</b>          |                    |                   |         |                   |                  |         |
| SaO2, %                            | 95.08 (7.3)        | 94.79 (8.7)       | 0.031   | 95.77 (5.1)       | 94.9 (7.1)       | 0.001   |
| paCO2, mmHg                        | 43.67 (14.6)       | 42.63 (14.3)      | <0.001  | 41.37 (9.7)       | 42.6 (13.5)      | 0.017   |
| pH                                 | 7.35 (0.1)         | 7.35 (0.1)        | <0.001  | 7.36 (0.1)        | 7.4 (0.1)        | 0.041   |
| Carboxyhemoglobin*, %              | 1.08 (0.8)         | 1.08 (0.8)        | 0.99    | 1.33 (0.8)        | 1.3 (0.7)        | 0.88    |
| Methemoglobin*, %                  | 0.6 (0.4)          | 0.62 (0.5)        | 0.12    | 2.24 (5.7)        | 1.8 (2.6)        | 0.61    |
| <b>Vital signs</b>                 |                    |                   |         |                   |                  |         |
| SpO2, %                            | 96.7 (5.1)         | 97.05 (6.6)       | <0.001  | 97.18 (4.7)       | 97.1 (6.3)       | 0.84    |
| Heart rate, bpm                    | 90.01 (20.4)       | 90.74 (20.3)      | 0.02    | 85.28 (17.6)      | 88.2 (19.8)      | <0.001  |
| Respiratory rate, breaths/min      | 19.95 (7.2)        | 20.31 (7.8)       | 0.006   | 19.02 (5.7)       | 19.6 (5.9)       | 0.009   |
| Temperature, C°                    | 36.72 (0.9)        | 36.68 (1)         | 0.03    | 36.77 (0.8)       | 36.7 (0.8)       | 0.18    |
| Systolic blood pressure, mmHg      | 118.96 (25.8)      | 123.12 (28.6)     | <0.001  | 113.19 (19.9)     | 117.1 (23.5)     | <0.001  |
| <b>Blood count</b>                 |                    |                   |         |                   |                  |         |
| Hemoglobin, g/dL                   | 11.14 (2.3)        | 10.8 (2.4)        | <0.001  | 10.44 (1.8)       | 10 (1.9)         | <0.001  |
| Hematocrit, %                      | 33.84 (6.9)        | 32.89 (7.1)       | <0.001  | 31.17 (5.2)       | 30.9 (5.8)       | 0.16    |
| White blood cell count, 1000/μL    | 13.62 (7.7)        | 12.44 (7.4)       | <0.001  | 14.35 (7.7)       | 12.7 (7.1)       | <0.001  |
| Platelet count, 1000/μL            | 203.82 (101.6)     | 204.36 (99.1)     | 0.73    | 181.99 (98.3)     | 182.1 (98.7)     | 0.97    |
| MCV, fL                            | 91.27 (6.7)        | 88.21 (7.5)       | <0.001  | 90.99 (6.2)       | 89.3 (7.3)       | <0.001  |
| <b>Chemistry</b>                   |                    |                   |         |                   |                  |         |
| Na, mEq/L                          | 138.7 (5.3)        | 139.21 (5.3)      | <0.001  | 138.54 (4.2)      | 138.8 (5.1)      | 0.23    |
| K, mEq/L                           | 4.15 (0.7)         | 4.19 (0.8)        | <0.001  | 4.3 (0.6)         | 4.4 (0.7)        | 0.05    |
| Bicarbonate, mEq/L                 | 23.61 (6.6)        | 23.48 (6.7)       | 0.22    | 23.09 (4.4)       | 22.7 (5.7)       | 0.1     |
| Creatinine, mg/dL                  | 1.51 (1.4)         | 2.17 (2.2)        | <0.001  | 1.33 (1.1)        | 2.1 (2)          | <0.001  |
| Glucose, mg/dL                     | 156.01 (78.1)      | 157.33 (93)       | 0.35    | 137.38 (55.7)     | 149.8 (72.4)     | <0.001  |
| Lactate*, mmol/L                   | 2.81 (3)           | 3.13 (3.4)        | <0.001  | 2.36 (2)          | 2.7 (2.7)        | 0.002   |
| Total bilirubin*, mg/dL            | 1.15 (2.2)         | 1.15 (2.1)        | 0.87    | 1.81 (3.9)        | 1.8 (4.3)        | 0.95    |
| <b>Other</b>                       |                    |                   |         |                   |                  |         |
| In-hospital mortality              | 0.17 (0.4)         | 0.17 (0.4)        | 0.31    | 0.15 (0.4)        | 0.2 (0.4)        | 0.013   |

315  
 316

317 **Supplementary Table 2. Odds ratios of occult hypoxemia in multivariable logistic**  
 318 **regression models.** Odds ratios, 95% confidence intervals and p-values of race and covariates  
 319 are also shown. Age, BMI, paCO<sub>2</sub>, heart rate, respiratory rate and sodium level are scaled by a  
 320 factor of 5. Systolic blood pressure, white blood cell count and MCV are scaled by a factor of 10.  
 321 Platelet count and glucose are scaled by a factor of 100. Arterial blood pH is scaled by a factor  
 322 of 1/10.

323

| Variable                   | eICU                |         |  | MIMIC-IV            |         |  |
|----------------------------|---------------------|---------|--|---------------------|---------|--|
|                            | Odds Ratio (95% CI) | p-value |  | Odds Ratio (95% CI) | p-value |  |
| <b>Unadjusted</b>          |                     |         |  |                     |         |  |
| Black race                 | 1.66 (1.41, 1.95)   | <0.001  |  | 2.00 (1.22, 3.14)   | 0.004   |  |
| <b>Multivariable model</b> |                     |         |  |                     |         |  |
| Black race (vs. White)     | 1.17 (0.91, 1.48)   | 0.22    |  | 1.57 (0.85, 2.76)   | 0.13    |  |
| Male sex (vs. female)      | 1.10 (0.95, 1.27)   | 0.2     |  | 1.18 (0.78, 1.8)    | 0.44    |  |
| Age                        | 0.98 (0.95, 1)      | 0.049   |  | 0.93 (0.87, 1)      | 0.04    |  |
| BMI                        | 0.98 (0.95, 1.01)   | 0.32    |  | 0.92 (0.81, 1.03)   | 0.15    |  |
| paCO <sub>2</sub>          | 1.09 (1.07, 1.11)   | <0.001  |  | 1.27 (1.17, 1.37)   | <0.001  |  |
| pH                         | 0.78 (0.72, 0.84)   | <0.001  |  | 1.23 (0.95, 1.61)   | 0.13    |  |
| Heart rate                 | 1.01 (1, 1.03)      | 0.14    |  | 1.07 (1.01, 1.12)   | 0.02    |  |
| Respiratory rate           | 1.14 (1.09, 1.19)   | <0.001  |  | 1.28 (1.09, 1.49)   | 0.002   |  |
| Temperature (C°)           | 0.95 (0.88, 1.03)   | 0.19    |  | 0.66 (0.51, 0.85)   | 0.002   |  |
| Systolic blood pressure    | 0.96 (0.93, 0.98)   | 0.001   |  | 1.04 (0.95, 1.14)   | 0.39    |  |
| Hemoglobin                 | 0.95 (0.92, 0.98)   | 0.001   |  | 0.86 (0.77, 0.95)   | 0.005   |  |
| White blood cell count     | 0.95 (0.87, 1.04)   | 0.32    |  | 1.13 (0.91, 1.37)   | 0.23    |  |
| Platelet count             | 0.97 (0.9, 1.05)    | 0.47    |  | 1.04 (0.87, 1.23)   | 0.62    |  |
| MCV                        | 1.05 (0.95, 1.16)   | 0.33    |  | 1.41 (1.06, 1.86)   | 0.018   |  |
| Na                         | 0.98 (0.91, 1.04)   | 0.47    |  | 0.82 (0.66, 1.01)   | 0.06    |  |
| K                          | 0.96 (0.87, 1.07)   | 0.45    |  | 0.62 (0.44, 0.87)   | 0.007   |  |
| Creatinine                 | 1.07 (1.02, 1.12)   | 0.005   |  | 1.25 (1.09, 1.42)   | <0.001  |  |
| Glucose                    | 1.02 (0.93, 1.11)   | 0.68    |  | 1.34 (0.99, 1.78)   | 0.05    |  |

324

325
